# Supplementary material
Source: publisher site journal article supplement (https://www.dovepress.com/article/379453)
Supplement: Supplementary file 1 [file get_supplementary_file.php]

| Supplementary Table S1. Results for Shapiro-Wilk test. | |
| --- | --- |
| Variable | p value (Shapiro-Wilk test) |
| Age | < 0.001 |
| BMI | 0.082 |
| Lymphocyte, 109/L | < 0.001 |
| Monocyte, 109/L | < 0.001 |
| Neutrophils, 10^9/L | < 0.001 |
| Hemoglobin, g/L | 0.136 |
| ESR, mm/H | < 0.001 |
| LMR | < 0.001 |
| CT value | < 0.001 |
| Hospital stay, day | < 0.001 |
| Albumin, g/L | < 0.001 |
| Total serum protein, g/L | 0.184 |
| VAS | < 0.001 |
| BMI, body mass index; VAS, visual analogue scale; LMR, lymphocyte monocyte ratio; ESR, erythrocyte sedimentation rate; | |

Supplementary Table S2. Multiple adjusted ORs for severe degeneration associated with demographics and clinical risk factors

| Variable | Model 2 | Model 3 | Model 4 |
| --- | --- | --- | --- |
| Lymphocyte | 0.861(0.523-1.418) | - | 0.682(0.386-1.206) |
| Monocyte | - | 3.467(0.463-25.941) | 7.154(0.711-71.998) |
| Age | 1.085(1.048-1.123) | 1.085(1.048-1.123) | 1.082(1.045-1.120) |
| Gender (male) | 0.720(0.344-1.510) | 0.668(0.314-1.419) | 0.578(0.263-1.271) |
| BMI | 0.987(0.905-1.076) | 0.982(0.901-1.071) | 0.988(0.905-1.079) |
| Smoking | 0.923(0.350-2.435) | 0.948(0.358-2.507) | 1.049(0.392-2.807) |
| Alcohol abuse | 1.175(0.383-3.605) | 1.138(0.369-3.505) | 1.098(0.358-3.372) |
| Neutrophils | 0.985(0.842-1.152) | 0.920(0.760-1.114) | 0.889(0.728-1.087) |
| Hemoglobin | 1.013(0.990-1.036) | 1.011(0.989-1.034) | 1.014(0.991-1.038) |
| ESR | 1.022(0.991-1.055) | 1.024(0.992-1.057) | 1.022(0.990-1.055) |
| Hypertension | 1.265(0.644-2.487) | 1.240(0.629-2.443) | 1.247(0.631-2.467) |
| Diabetes mellitus | 1.078(0.473-2.457) | 0.987(0.436-2.234) | 1.076(0.464-2.495) |
| CHD | 0.214(0.085-0.541) | 0.199(0.078-0.506) | 0.204(0.080-0.522) |
| Osteoporosis | 0.755(0.395-1.444) | 0.756(0.395-1.446) | 0.725(0.377-1.396) |
| Albumin | 0.960(0.844-1.092) | 0.981(0.863-1.115) | 0.968(0.849-1.102) |
| Total serum protein | 1.025(0.937-1.121) | 1.017(0.931-1.112) | 1.026(0.938-1.124) |
| BMI, body mass index; LMR, lymphocyte monocyte ratio; ESR, erythrocyte sedimentation rate; CHD, coronary heart disease. | | | |

Supplementary Table S3. Multiple adjusted ORs for spinal fusion failure associated with demographics and clinical risk factors

| Variable | Model 6 | Model 7 | Model 8 |
| --- | --- | --- | --- |
| Lymphocyte | 0.428(0.246-0.744) | - | 0.157(0.074-0.333) |
| Monocyte | - | 14.409(1.811-114.635) | 807.348(44.958-14498.070) |
| Age | 1.035(1.005-1.067) | 1.039(1.009-1.069) | 1.023(0.992-1.056) |
| Gender (male) | 3.453(1.641-7.267) | 2.987(1.431-6.237) | 2.061(0.930-4.565) |
| BMI | 1.007(0.924-1.098) | 0.987(0.907-1.074) | 1.006(0.919-1.102) |
| Smoking | 0.397(0.139-1.134) | 0.435(0.160-1.185) | 0.560(0.186-1.683) |
| Alcohol abuse | 4.007(1.192-13.470) | 3.629(1.102-11.949) | 3.528(1.005-12.383) |
| Neutrophils | 1.203(1.018-1.422) | 1.044(0.852-1.281) | 0.889(0.703-1.126) |
| Hemoglobin | 0.982(0.959-1.006) | 0.977(0.954-1.000) | 0.982(0.957-1.007) |
| ESR | 0.983(0.954-1.014) | 0.990(0.962-1.020) | 0.976(0.945-1.009) |
| Hypertension | 0.764(0.373-1.563) | 0.746(0.366-1.525) | 0.787(0.367-1.684) |
| Diabetes mellitus | 0.868(0.356-2.113) | 0.649(0.272-1.548) | 0.780(0.296-2.056) |
| CHD | 1.060(0.409-2.748) | 0.838(0.332-2.116) | 0.919(0.329-2.569) |
| Osteoporosis | 0.564(0.282-1.125) | 0.583(0.292-1.166) | 0.451(0.213-0.957) |
| Albumin | 0.927(0.809-1.061) | 0.987(0.867-1.123) | 0.923(0.801-1.063) |
| Total serum protein | 1.036(0.944-1.138) | 1.006(0.919-1.101) | 1.063(0.962-1.173) |
| BMI, body mass index; LMR, lymphocyte monocyte ratio; ESR, erythrocyte sedimentation rate; CHD, coronary heart disease. | | | |


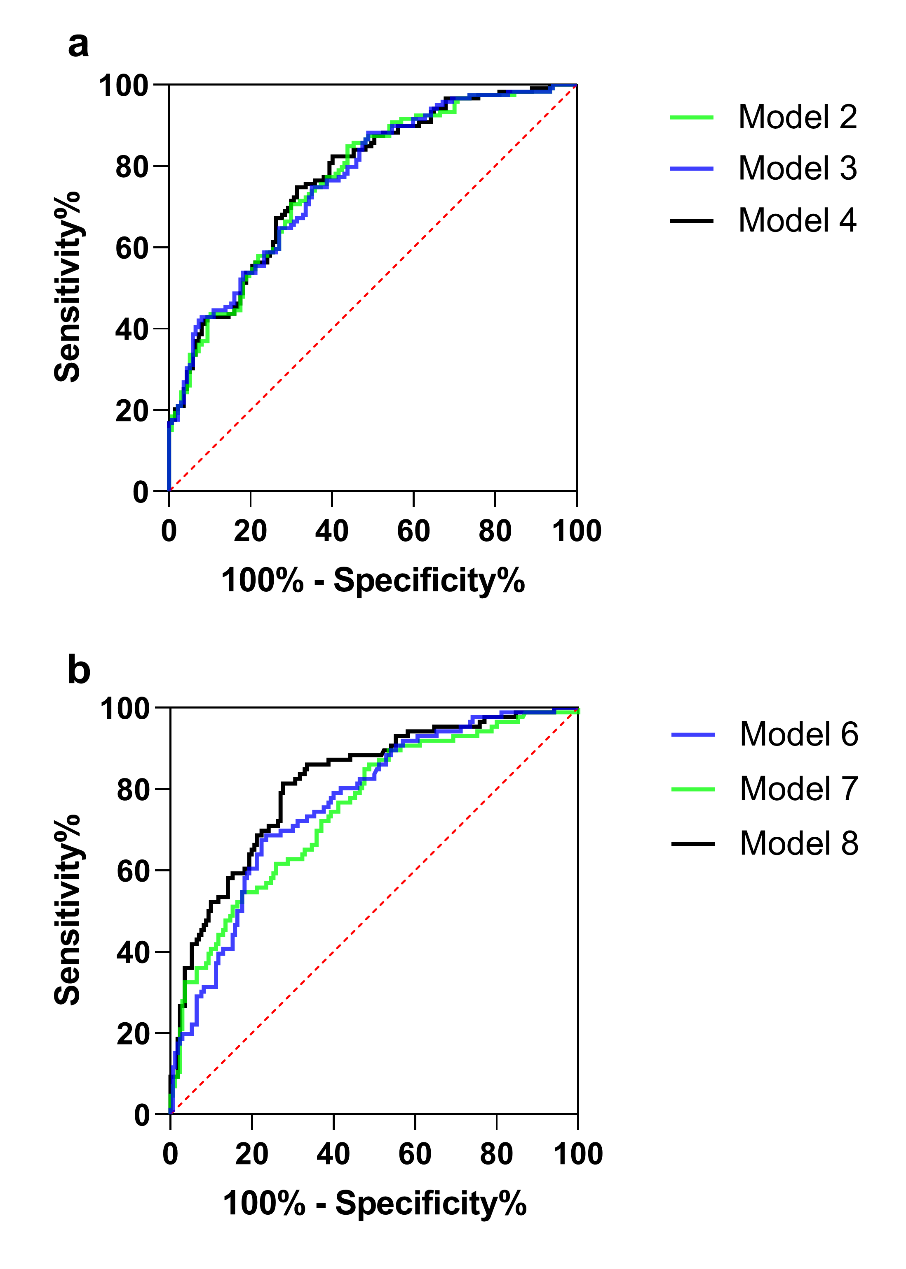


Supplementary figure S1: ROC curve analysis of prognostic models 2, 3, and 4 of severe degeneration (a). ROC curve analysis of prognostic models 6, 7, and 8 of spinal fusion failure (b).
